# Supplementary material for: Co-regulatory Network of RNA-Binding Proteins and Alternative Splicing in the Pathogenesis of Lupus Nephritis
Source: Research Square preprint supplement (doi:10.21203/rs.3.rs-7090892/v1), 2025-08-22
Supplement: Supplementary file 1 [file 605075f4d9f08be7afdda89f.docx]

**Supplementary Table 1. Primers for RT-qPCR analysis.**

| JUN-F: | AAGAAGTGTCCGAGAACTAAAGCC |
| --- | --- |
| JUN-R: | GGACAGCCCGTCCGCAAAGC |
| IFI44-F: | AGGGAGGAAATTATCAACTGTG |
| IFI44-R: | GATACTTCTCTTTGGTCTGTGT |
| STAT1-F: | TGAGTGGATGATGTTTCGTGAA |
| STAT1-R: | AGTTGTGGTAGCAGTAGTGGAA |
| IFIT3-F: | ATGGTGACTGCCTAACAACAA |
| IFIT3-R: | ACATGCCTGAAGCTATAAGTGA |
| IRF7-F: | CAGCGTGAGGGTGTGTCTT |
| IRF7-R: | CAGCTCCATAAGGAAGCACTC |
| NR4A1-F: | ATGACTCCACCTTCTCACCTG |
| NR4A1-R: | GCAGCACTGGGCTTATTTACA |
| OAS3-F: | GTACAATTCAGTGGTGTGAGTA |
| OAS3-R: | GCATCTGTGATATGGCTCTAGT |
| ZFP36-F: | GAGTGTCTTCCGAGGTTCTTG |
| ZFP36-R: | AGAGGTTCCAGTTACCAGGAG |
| S100A16-M/AS-F: | TCTTGACCAGGCTGTACTTAG |
| S100A16-AS-R: | CCCGCCTTAGGCCCCGCCAG |
| S100A16-M-R: | TGAGGCAGCAGGCCCCGCCAG |
| TEP1-M/AS-F: | TGAGAAAGTGACCATCAGGAGCCC |
| TEP1-AS-R: | GAAATTTGAGTCTTCACCTGA |
| TEP1-M-R: | CACAGCACAGTCTTCACCTGA |
| NR4A1-M-F: | GAGGAAGCTGAGATGCCCTGTA |
| NR4A1-AS-F: | AGCCGGCCGGAGATGCCCTGTA |
| NR4A1-M/AS-R: | CTTGATGAACTCAGGGGTCAGG |
| STYXL1-M-F: | ACCAGGCATCCTGGAAAAATG |
| STYXL1-AS-F: | AGGCATCCTGCTGGAAAAATG |
| STYXL1-M/AS-R: | GGTTCTAGCGTAGCCGTCTGTG |
| hum-GAPDH-F: | GGTCGGAGTCAACGGATTTG |
| hum-GAPDH-R: | GGAAGATGGTGATGGGATTTC |
